# Supplementary material for: Evolvability in the Cephalothoracic Structural Complexity of Aegla araucaniensis (Crustacea: Decapoda) Determined by a Developmental System with Low Covariational Constraint
Source: Biology (Basel). 2022 Jun 24;11(7):958. doi: 10.3390/biology11070958 (PMC9311601; doi:10.3390/biology11070958)
Supplement: Supplementary file 1 [file biology-11-00958-s001.zip › Table S1.xlsx]

## Sheet: Hoja1
										All individual					Females						Males
	Model category		Model		K		LogL	AICc	ΔAICc	Model LogL	MPP		LogL	AICc	ΔAICc	Model LogL	MPP		LogL	AICc	ΔAICc	Model LogL	MPP
			-No modularity		2		1260.19	-2516.36	220.48	1.32e-48	7.53e-49		1674.49	-3344.97	173.76	1.86e-38	1.36e-38		2531.87	-5059.73	51.91	5.34e-12	3.22e-12
	Bimodularity		Developmental modularity
	models		-Same intramodular correlation		3		1285.17	-2564.33	172.51	3.46e-38	1.96e-38		1682.5	-3359	159.73	2.07e-35	1.51e-35		2553.87	-5101.73	9.9	0.00707	0.00427
			-Different intramodular correlation		4		1291.14	-2574.27	162.58	4.97e-36	2.82e-38		1682.5	-3356.99	161.73	7.58e-36	5.5e-36		2557.99	5107.96	3.68	0.159	0.0958
			Female Gonadic modularity
			-Same intramodular correlation		3		1371.16	-2739.3	0.54	0.763	0.433		1762.37	-3518.72	0	1	0.732		2540.89	-5075.76	35.88	1.62e-08	9.78e-09
			-Different intramodular correlation		4		1372.43	-2736.85	0	1	0.567		1762.37	-3516.72	2.01	0.366	0.268		2540.89	-5073.75	37.88	5.94e-09	3.58e-09
			Male agonisticic modularity
			-Same intramodular correlation		3		1292.05	-2578.08	158.76	3.35e-35	1.9e-35		1685.41	-3364.8	153.92	3.77e-34	2.76e-34		2558.82	-5111.64	0	1	0.603
			-Different intramodular correlation		4		1294.11	-2580.2	156.64	9.68e-35	5.48e-35		1686.27	-3364.52	154.2	3.8e-34	2.4e-34		2559.12	-5110.22	1.42	0.492	0.297
	Multimodularity		Anatomical modularity I
	models		-SIC - SBMC		3		1275.03	-2544.05	192.79	1.37e-42	7.75e-43		1677.2	-3348.38	170.34	1.02594e-37	7.50779e-38		2542.78	-5079.54	34.4715	3.27054e-08	1.30378e-08
			-SIC - DBMC		8		1283.75	-2551.44	185.41	5.48e-41	3.11e-41		1679.56	-3343.06	175.663	7.16488e-39	5.24321e-39		2552.25	-5088.43	25.5887	2.77642e-06	1.10681e-06
			-DIC - SBMC		17		1371.08	-2707.87	28.9739	5.10966e-07	2.89856e-07		1725.04	-3415.78	102.942	4.43109e-23	3.24264e-23		2569.75	-5105.21	8.80546	0.0122439	0.00488097
			-DIC - DBMC		22		1379.8	-2715.12	21.7226	1.91868e-05	1.08841e-05		1727.4	-3410.33	108.398	2.89548e-24	2.11889e-24		2579.22	-5113.96	0.0556736	0.972547	0.387701
			Anatomical modularity II
			-SIC - SBMC		3		1280.61	-2555.21	181.636	3.61606e-40	2.05129e-40		1678.98	-3351.95	166.777	6.09236e-37	4.45835e-37		2547.4	-5088.79	25.222	3.33515e-06	1.32954e-06
			-SIC - DBMC		8		1286.25	-2556.42	180.421	6.6393e-40	3.76628e-40		1682.54	-3349.01	169.719	1.39969e-37	1.02428e-37		2551.39	-5086.7	27.3094	1.17447e-06	4.68195e-07
			-DIC - SBMC		17		1364.57	-2694.86	41.9883	7.62701e-10	4.32658e-10		1728.07	-3421.85	96.8784	9.18575e-22	6.72207e-22		2568.75	-5103.2	10.8113	0.00449104	0.00179033
			-DIC - DBMC		22		1370.21	-2695.94	40.906	1.31029e-09	7.43287e-10		1731.62	-3418.77	99.953	1.97463e-22	1.44502e-22		2572.73	-5100.98	13.0317	0.00147978	0.000589907
			Anatomical modularity III
			-SIC - SBMC		3		1287.31	-2568.6	168.242	2.92846e-37	1.66123e-37		1681.29	-3356.57	162.15	6.15921e-36	4.50727e-36		2552.6	-5099.19	14.8206	0.000604994	0.000241178
			-SIC - DBMC		8		1298.03	-2580	156.845	8.7389e-35	4.95732e-35		1689.09	-3362.11	156.612	9.8185e-35	7.18512e-35		2553.33	-5090.59	23.4264	8.18496e-06	3.26289e-06
			-DIC - SBMC		17		1323.6	-2612.91	123.932	1.22599e-27	6.95468e-28		1706.54	-3378.8	139.924	4.12971e-31	3.02209e-31		2574.15	-5114.02	0	1	0.398645
			-DIC - DBMC		22		1334.33	-2624.18	112.668	3.42318e-25	1.94187e-25		1714.34	-3384.2	134.519	6.15977e-30	4.50768e-30		2574.88	-5105.28	8.73881	0.0126587	0.00504635
